# Supplementary material
Source: MDPI journal article supplement (https://www.mdpi.com/1999-4907/14/4/842)
Supplement: s1 [file s1]

Table S1 Primers used in this study

| Primer name | Primer sequence (5'-3') |
|-------------|-------------------------|
| Q-4CL2-F    | GCGGTGAAGATCAACCCAGA    |
| Q-4CL2-R    | CGACGACAAGTCGTACCGAT    |
| Q-ADG1-F    | AGCTCTCAGACGACCTTCCT    |
| Q-ADG1-R    | GGAATCGGAGACGGCCTTAG    |
| Q-ANAC104-F | AGCTCCGGTAACAAAGTGGG    |
| Q-ANAC104-R | CTCGGTTCCATCGTCATCGT    |
| Q-BAN-F     | GGCTACCCTGTGTCCAAGAC    |
| Q-BAN-R     | AATACGTGAGCTCGGCAGAC    |
| Q-BFRUCT1-F | CCCTGCAGAACAGCCTTACA    |
| Q-BFRUCT1-R | TCAGTGGATGTTGAGTGGGC    |
| Q-CHS-F     | GTAATCCTGGGCGCTGACC     |
| Q-CHS-R     | ATCAAGAATCGCTGGCCCTC    |
| Q-GBSS-F    | AGGATTGAGACCGTTCGCTTT   |
| Q-GBSS-R    | GCCAGTCATTGGCAACGAAAAC  |
| Q-MYB9-F    | GGCGCTGAAGTAGTCTCTCC    |
| Q-MYB9-R    | GACAGAAACGGCTGAGTCCA    |
| Q-PAL2-F    | AAGCCGAAACAAGACCGCTA    |
| Q-PAL2-R    | GAATCCGTAGTCCAGGCTCG    |
