# Supplementary material
Source: MDPI journal article supplement (https://www.mdpi.com/1999-4907/14/4/842)
Supplement: s1 [file s1]

Table S2 Summary of RNA-seq dataset

| Sample | Before Filter |        |        | After Filter |        |        |
|--------|---------------|--------|--------|--------------|--------|--------|
|        | Before Filter | Q20(%) | Q30(%) | After Filter | Q20(%) | Q30(%) |
|        | Data (bp)     |        |        | Data(bp)     |        |        |
| L0-1   | 9857238300    | 98.04% | 94.41% | 9814687360   | 98.10% | 94.50% |
| L0-2   | 8965222200    | 98.21% | 94.80% | 8913533693   | 98.26% | 94.88% |
| L0-3   | 8641573200    | 97.99% | 94.33% | 8606212927   | 98.05% | 94.41% |
| S0-1   | 8494725000    | 96.59% | 91.20% | 8457498500   | 96.66% | 91.30% |
| S0-2   | 8644629900    | 97.90% | 94.15% | 8600900440   | 97.97% | 94.24% |
| S0-3   | 8947012800    | 97.90% | 94.12% | 8899832343   | 97.96% | 94.21% |
| R0-1   | 8302336500    | 98.05% | 94.48% | 8260461903   | 98.12% | 94.57% |
| R0-2   | 8809115100    | 98.20% | 94.84% | 8767295445   | 98.26% | 94.92% |
| R0-3   | 8215347600    | 98.01% | 94.42% | 8173897399   | 98.09% | 94.52% |
| L450-1 | 7125687300    | 98.28% | 94.86% | 7091278218   | 98.33% | 94.93% |
| L450-2 | 8661701400    | 98.26% | 94.80% | 8624913406   | 98.31% | 94.87% |
| L450-3 | 7599396000    | 98.16% | 94.72% | 7557584160   | 98.22% | 94.80% |
| S450-1 | 8493393900    | 98.05% | 94.54% | 8454829286   | 98.12% | 94.63% |
| S450-2 | 7432692000    | 98.09% | 94.52% | 7400053720   | 98.15% | 94.61% |
| S450-3 | 8114304000    | 98.24% | 94.81% | 8055960813   | 98.31% | 94.91% |
| R450-1 | 7897702800    | 98.13% | 94.48% | 7865481443   | 98.19% | 94.57% |
| R450-2 | 7738799100    | 98.15% | 94.54% | 7708731405   | 98.21% | 94.62% |
| R450-3 | 7247031600    | 96.91% | 91.73% | 7216756536   | 96.97% | 91.82% |

Data (PE) = Reads1 Num x Read1 length + Reads2 Num x Read2 length

Data (SE) = Reads Num x Read

length
